# Supplementary material
Source: publisher site journal article supplement (https://www.dovepress.com/article/254740)
Supplement: Supplementary file 1 [file get_supplementary_file.php]

Supplementary Table 1. The genetic models without significant differences

| SNP | Model | | Case | Control | OR (95% CI) | P | *Pcorr* |
| --- | --- | --- | --- | --- | --- | --- | --- |
| rs6499640 | Codominant | G/G | 513 | 576 | 1 | 0.875 | >1.000 |
|  |  | A/G | 209 | 231 | 1.016 (0.814-1.268) |  |  |
|  |  | A/A | 19 | 18 | 1.185 (0.615-2.283) |  |  |
|  | Dominant | G/G | 513 | 576 | 1 | 0.801 | >1.000 |
|  |  | A/G-A/A | 228 | 249 | 1.028 (0.829-1.275) |  |  |
|  | Recessive | G/G-A/G | 722 | 807 | 1 | 0.619 | >1.000 |
|  |  | A/A | 19 | 18 | 1.180 (0.614-2.266) |  |  |
|  | Overdominant | G/G-A/A | 532 | 594 | 1 | 0.928 | >1.000 |
|  |  | A/G | 209 | 231 | 1.010 (0.810-1.260) |  |  |
|  | Log-additive | - | 741 | 825 | 1.037 (0.856-1.256) | 0.711 | >1.000 |
| rs1421085 | Codominant | T/T | 541 | 649 | 1 | 0.014 | >1.000 |
|  |  | T/C | 186 | 169 | 1.320 (1.041-1.674) |  |  |
|  |  | C/C | 14 | 7 | 2.399 (0.961-5.987) |  |  |
|  | Dominant | T/T | 541 | 649 | 1 | 0.009 | >1.000 |
|  |  | T/C-C/C | 200 | 176 | 1.363 (1.080-1.720) |  |  |
|  | Recessive | T/T-T/C | 727 | 818 | 1 | 0.072 | >1.000 |
|  |  | C/C | 14 | 7 | 2.250 (0.903-5.606) |  |  |
|  | Overdominant | T/T-C/C | 555 | 656 | 1 | 0.029 | >1.000 |
|  |  | T/C | 186 | 169 | 1.301 (1.026-1.649) |  |  |
| rs8050136 | Codominant | C/C | 541 | 652 | 1 | 0.012 | >1.000 |
|  |  | C/A | 187 | 166 | 1.358 (1.070-1.723) |  |  |
|  |  | A/A | 13 | 7 | 2.238 (0.887-5.649) |  |  |
|  | Recessive | C/C-C/A | 728 | 818 | 1 | 0.109 | >1.000 |
|  |  | A/A | 13 | 7 | 2.087 (0.828-5.259) |  |  |
|  | Overdominant | C/C-A/A | 554 | 659 | 1 | 0.016 | >1.000 |
|  |  | C/A | 187 | 166 | 1.340 (1.057-1.699) |  |  |
| rs3751812 | Codominant | G/G | 539 | 650 | 1 | 0.011 | >1.000 |
|  |  | G/T | 189 | 168 | 1.357 (1.070-1.720) |  |  |
|  |  | T/T | 13 | 7 | 2.240 (0.887-5.653) |  |  |
|  | Recessive | G/G-G/T | 728 | 818 | 1 | 0.109 | >1.000 |
|  |  | T/T | 13 | 7 | 2.087 (0.828-5.259) |  |  |
|  | Overdominant | G/G-T/T | 552 | 657 | 1 | 0.016 | >1.000 |
|  |  | G/T | 189 | 168 | 1.339 (1.057-1.696) |  |  |
| rs9939609 | Codominant | T/T | 539 | 650 | 1 | 0.011 | >1.000 |
|  |  | T/A | 189 | 168 | 1.357 (1.070-1.720) |  |  |
|  |  | A/A | 13 | 7 | 2.240 (0.887-5.653) |  |  |
|  | Recessive | T/T-T/A | 728 | 818 | 1 | 0.109 | >1.000 |
|  |  | A/A | 13 | 7 | 2.087 (0.828-5.259) |  |  |
|  | Overdominant | T/T-A/A | 552 | 657 | 1 | 0.016 | >1.000 |
|  |  | T/A | 189 | 168 | 1.339 (1.057-1.696) |  |  |
| rs9930506 | Codominant | A/A | 482 | 564 | 1 | 0.043 | >1.000 |
|  |  | A/G | 226 | 242 | 1.093 (0.878-1.359) |  |  |
|  |  | G/G | 33 | 19 | 2.032 (1.141-3.620) |  |  |
|  | Dominant | A/A | 482 | 564 | 1 | 0.164 | >1.000 |
|  |  | A/G-G/G | 259 | 261 | 1.161 (0.941-1.433) |  |  |
|  | Recessive | A/A-A/G | 708 | 806 | 1 | 0.017 | >1.000 |
|  |  | G/G | 33 | 19 | 1.977 (1.114-3.508) |  |  |
|  | Overdominant | A/A-G/G | 515 | 583 | 1 | 0.615 | >1.000 |
|  |  | A/G | 226 | 242 | 1.057 (0.851-1.313) |  |  |
|  | Log-additive | - | 741 | 825 | 1.201 (1.001-1.441) | 0.048 | >1.000 |
